# Supplementary material for: Association between serum vitamin D levels and Helicobacter pylori cytotoxic-associated gene A seropositivity: a cross-sectional study in US adults from NHANES III
Source: HighWire-hosted journal article supplement (doi:10.1136/bmjopen-2021-058164), 2022-04-01
Supplement: bmjopen-2021-058164supp001_data_supplement.pdf [file bmjopen-2021-058164supp001_data_supplement.pdf]

**Table S1.** Tests for multicollinearity in all variables.

| Variable name                        | Variance inflation factor value |
|--------------------------------------|---------------------------------|
| Serum 25(OH)D (ng/mL)                | 1.2                             |
| Race/Ethnicity                       | 1.7                             |
| Sex                                  | 2.0                             |
| Age (years)                          | 1.8                             |
| Family income to poverty ratio       | 1.3                             |
| Education level                      | 1.4                             |
| Marital status                       | 1.2                             |
| Place of birth                       | 1.4                             |
| Food intake status                   | 1.4                             |
| Smoking status                       | 1.0                             |
| Alcohol consumption                  | 1.3                             |
| Physical exercise                    | 1.2                             |
| Source of drinking water             | 1.1                             |
| Peptic ulcer                         | 1.1                             |
| Cardiovascular disease               | 1.1                             |
| Respiratory disease                  | 1.0                             |
| Diabetes                             | 1.1                             |
| Osteoporosis                         | 1.0                             |
| Body mass index (kg/m <sup>2</sup> ) | 1.1                             |
| Hemoglobin                           | 1.7                             |
| Serum cholesterol                    | 1.6                             |
| Serum triglycerides                  | 1.6                             |
| Serum ferritin (ng/mL)               | 1.2                             |
| Serum folate (ng/mL)                 | 1.4                             |
| Serum vitamin A (ug/dL)              | 1.6                             |
| Serum vitamin E (ug/dL)              | 2.3                             |
| Serum vitamin C (mg/dL)              | 1.0                             |
| Serum $\alpha$ carotene (ug/dL)      | 1.6                             |
| Serum $\beta$ carotene (ug/dL)       | 1.6                             |
| Plasma glucose (mg/dL)               | 2.7                             |
| Glycated hemoglobin                  | 2.7                             |
| Serum C-reactive protein (mg/dL)     | 1.1                             |
| Serum creatinine (mg/dL)             | 1.4                             |
| Serum thyroid stim hormone (U/L)     | 1.1                             |
| Serum thyroxine (ug/dL)              | 1.1                             |

**Note:** Race/ethnicity (non-Hispanic white/black, Mexican-American, other); Sex(male, female); Family income to poverty ratio (<1.85, 1.85~3.5, >3.5); Education level (less than high school, high school, high school above); Marital status (married, never married, other); Place of birth (50 United States, Mexico, other); Food intake status (enough food to eat, sometimes not enough, often not enough); Smoking status (never, former smoker, current smoker); Alcohol consumption (never, < 1 time/month, 2~4 times/month, > 4 times/month); Physical exercise (no, yes); Source of drinking water (tapping water, bottled water); Peptic ulcer (no, yes); Cardiovascular disease includes congestive heart failure, hypertension, heart attack and stroke (no, yes); Respiratory disease includes asthma, chronic bronchitis and emphysema (no, yes); Diabetes (no, yes); Osteoporosis(no, yes); Body mass index (<25, 25~30, >30);

Table S2. Associations of covariates with *H. pylori* CagA seropositivity.

| Covariate                                 | Beta      | Se        | Exp (95% CI)         | p. value  |
|-------------------------------------------|-----------|-----------|----------------------|-----------|
| <b>Family income to poverty ratio</b>     |           |           |                      |           |
| < 1.85                                    | Reference | Reference | Reference            | Reference |
| 1.85~3.5                                  | 0.025     | 0.085     | 1.025 (0.868, 1.212) | 0.769     |
| > 3.5                                     | -0.056    | 0.106     | 0.946 (0.768, 1.164) | 0.598     |
| <b>Education level</b>                    |           |           |                      |           |
| Less than high school                     | Reference | Reference | Reference            | Reference |
| High school                               | -0.202    | 0.086     | 0.817 (0.690, 0.967) | 0.019     |
| Above high school                         | -0.005    | 0.109     | 0.995 (0.804, 1.232) | 0.964     |
| <b>Marital status</b>                     |           |           |                      |           |
| Never married                             | Reference | Reference | Reference            | Reference |
| Married                                   | 0.088     | 0.129     | 1.092 (0.849, 1.404) | 0.495     |
| Other                                     | 0.032     | 0.093     | 1.033 (0.861, 1.238) | 0.729     |
| <b>Place of birth</b>                     |           |           |                      |           |
| 50 United States                          | Reference | Reference | Reference            | Reference |
| Mexico                                    | 0.009     | 0.120     | 1.009 (0.798, 1.277) | 0.938     |
| Other                                     | 0.430     | 0.175     | 1.537 (1.090, 2.168) | 0.014     |
| <b>Smoking status</b>                     |           |           |                      |           |
| Never                                     | Reference | Reference | Reference            | Reference |
| Former smoker                             | -0.083    | 0.101     | 0.921 (0.756, 1.122) | 0.414     |
| Current smoker                            | -0.007    | 0.087     | 0.993 (0.836, 1.178) | 0.933     |
| <b>Alcohol consumption</b>                |           |           |                      |           |
| Never                                     | Reference | Reference | Reference            | Reference |
| < 1 time/month                            | 0.412     | 0.173     | 1.511 (1.077, 2.119) | 0.017     |
| 2~4 times/month                           | 0.109     | 0.103     | 1.116 (0.912, 1.364) | 0.287     |
| > 4 times/month                           | 0.069     | 0.095     | 1.071 (0.890, 1.290) | 0.467     |
| <b>Physical exercise</b>                  |           |           |                      |           |
| No                                        | Reference | Reference | Reference            | Reference |
| Yes                                       | 0.043     | 0.077     | 1.044 (0.898, 1.213) | 0.579     |
| <b>Source of drinking water</b>           |           |           |                      |           |
| Tapping water                             | Reference | Reference | Reference            | Reference |
| Bottled water                             | -0.031    | 0.122     | 0.970 (0.763, 1.232) | 0.802     |
| <b>Peptic ulcer</b>                       |           |           |                      |           |
| No                                        | Reference | Reference | Reference            | Reference |
| Yes                                       | -0.006    | 0.081     | 0.995 (0.849, 1.165) | 0.945     |
| <b>Cardiovascular disease</b>             |           |           |                      |           |
| No                                        | Reference | Reference | Reference            | Reference |
| Yes                                       | 0.050     | 0.081     | 1.051 (0.896, 1.232) | 0.541     |
| <b>Respiratory disease</b>                |           |           |                      |           |
| No                                        | Reference | Reference | Reference            | Reference |
| Yes                                       | -0.024    | 0.111     | 0.976 (0.785, 1.214) | 0.829     |
| <b>Diabetes</b>                           |           |           |                      |           |
| No                                        | Reference | Reference | Reference            | Reference |
| Yes                                       | 0.035     | 0.123     | 1.036 (0.814, 1.318) | 0.773     |
| <b>Osteoporosis</b>                       |           |           |                      |           |
| No                                        | Reference | Reference | Reference            | Reference |
| Yes                                       | 0.170     | 0.249     | 1.185 (0.728, 1.930) | 0.494     |
| <b>Body mass index (kg/m<sup>2</sup>)</b> |           |           |                      |           |
| < 25                                      | Reference | Reference | Reference            | Reference |
| 25~30                                     | -0.001    | 0.084     | 1.000 (0.849, 1.178) | 0.996     |
| > 30                                      | 0.007     | 0.095     | 1.007 (0.836, 1.213) | 0.939     |
| <b>Hemoglobin</b>                         | -0.060    | 0.030     | 0.942 (0.888, 0.999) | 0.047     |
| <b>Serum cholesterol</b>                  | -0.001    | 0.001     | 0.999 (0.998, 1.001) | 0.281     |
| <b>Serum triglycerides</b>                | -0.001    | 0.001     | 1.000 (0.999, 1.000) | 0.180     |
| <b>Serum ferritin (ng/mL)</b>             | -0.001    | 0.001     | 1.000 (0.999, 1.000) | 0.041     |

Table S2. (Continued).

| Covariate                        | <i>Beta</i> | <i>Se</i> | <i>Exp</i> (95% CI)  | <i>p. value</i> |
|----------------------------------|-------------|-----------|----------------------|-----------------|
| Serum folate (ng/mL)             | -0.005      | 0.009     | 0.995 (0.978, 1.012) | 0.535           |
| Serum vitamin A (ug/dL)          | -0.003      | 0.002     | 0.998 (0.993, 1.002) | 0.270           |
| Serum vitamin E (ug/dL)          | -0.001      | 0.001     | 1.000 (0.999, 1.000) | 0.107           |
| Serum vitamin C (mg/dL)          | -0.001      | 0.001     | 1.000 (0.998, 1.000) | 0.347           |
| Serum $\alpha$ carotene (ug/dL)  | -0.002      | 0.008     | 0.998 (0.983, 1.014) | 0.820           |
| Serum $\beta$ carotene (ug/dL)   | 0.003       | 0.002     | 1.003 (1.000, 1.006) | 0.095           |
| Plasma glucose (mg/dL)           | -0.001      | 0.001     | 1.000 (0.998, 1.001) | 0.867           |
| Glycated hemoglobin              | -0.028      | 0.032     | 0.973 (0.914, 1.036) | 0.389           |
| Serum C-reactive protein (mg/dL) | -0.047      | 0.046     | 0.954 (0.872, 1.044) | 0.305           |
| Serum creatinine (mg/dL)         | 0.003       | 0.117     | 1.003 (0.798, 1.261) | 0.978           |
| Serum thyroid stim hormone (U/L) | 0.001       | 0.006     | 1.001 (0.990, 1.013) | 0.857           |
| Serum thyroxine (ug/dL)          | 0.002       | 0.018     | 1.002 (0.968, 1.037) | 0.913           |

Note: Fixed variables (age, sex, race/ethnicity) were adjusted in the above analyses.

**Table S3.** Changes of the regression coefficient of 25(OH)D concentrations on *H. pylori* CagA seropositivity.

| Covariate                            | Regression coefficient                                                    |                                                                              |
|--------------------------------------|---------------------------------------------------------------------------|------------------------------------------------------------------------------|
|                                      | Crude model <sup>a</sup><br>(Original regression coefficient<br>= 0.0035) | Complete model <sup>b</sup><br>(Original regression coefficient<br>= 0.0048) |
| Family income to poverty ratio       | 0.0035                                                                    | 0.0048                                                                       |
| Education level                      | 0.0030 *                                                                  | 0.0052                                                                       |
| Marital status                       | 0.0037                                                                    | 0.0045                                                                       |
| Place of birth                       | 0.0037                                                                    | 0.0044                                                                       |
| Smoking status                       | 0.0036                                                                    | 0.0047                                                                       |
| Alcohol consumption                  | 0.0037                                                                    | 0.0045                                                                       |
| Physical exercise                    | 0.0032                                                                    | 0.0051                                                                       |
| Source of drinking water             | 0.0035                                                                    | 0.0048                                                                       |
| Peptic ulcer                         | 0.0035                                                                    | 0.0048                                                                       |
| Cardiovascular disease               | 0.0034                                                                    | 0.0048                                                                       |
| Respiratory disease                  | 0.0035                                                                    | 0.0048                                                                       |
| Diabetes                             | 0.0035                                                                    | 0.0048                                                                       |
| Osteoporosis                         | 0.0035                                                                    | 0.0047                                                                       |
| Body mass index (kg/m <sup>2</sup> ) | 0.0035                                                                    | 0.0045                                                                       |
| Hemoglobin                           | 0.0035                                                                    | 0.0048                                                                       |
| Serum cholesterol                    | 0.0037                                                                    | 0.0048                                                                       |
| Serum triglycerides                  | 0.0032                                                                    | 0.0047                                                                       |
| Serum ferritin (ng/mL)               | 0.0034                                                                    | 0.0048                                                                       |
| Serum folate (ng/mL)                 | 0.0042 *                                                                  | 0.0044                                                                       |
| Serum vitamin A (ug/dL)              | 0.0044 *                                                                  | 0.0043 *                                                                     |
| Serum vitamin E (ug/dL)              | 0.0044 *                                                                  | 0.0045                                                                       |
| Serum vitamin C (mg/dL)              | 0.0035                                                                    | 0.0047                                                                       |
| Serum $\alpha$ carotene (ug/dL)      | 0.0036                                                                    | 0.0045                                                                       |
| Serum $\beta$ carotene (ug/dL)       | 0.0022 *                                                                  | 0.0057 *                                                                     |
| Plasma glucose (mg/dL)               | 0.0034                                                                    | 0.0046                                                                       |
| Glycated hemoglobin                  | 0.0033                                                                    | 0.0048                                                                       |
| Serum C-reactive protein (mg/dL)     | 0.0035                                                                    | 0.0045                                                                       |
| Serum creatinine (mg/dL)             | 0.0035                                                                    | 0.0048                                                                       |
| Serum thyroid stim hormone (U/L)     | 0.0035                                                                    | 0.0047                                                                       |
| Serum thyroxine (ug/dL)              | 0.0035                                                                    | 0.0049                                                                       |

Note: Fixed variables (age, sex, race/ethnicity) were adjusted in the above analyses. The change of the regression coefficient of 25(OH)D concentrations was observed by introducing the covariate in crude model or dropping the covariate in complete model.

<sup>a</sup> Crude model includes no covariates.

<sup>b</sup> Complete model includes all above covariates.

\* The covariate changed the original regression coefficient more than 10%.

**Table S4.** Selected covariates as potential confounders in the study.

| Dependent variable                   | Independent variable   | Selected covariates (Standard 1) <sup>a</sup> | Selected covariates (Standard 2) <sup>b</sup> |
|--------------------------------------|------------------------|-----------------------------------------------|-----------------------------------------------|
| <i>H. pylori</i> CagA seropositivity | 25(OH)D concentrations |                                               | Education level                               |
|                                      |                        |                                               | Place of birth                                |
|                                      |                        | Education level                               | Alcohol consumption                           |
|                                      |                        | Serum folate                                  | Hemoglobin                                    |
|                                      |                        | Serum vitamin A                               | Serum ferritin                                |
|                                      |                        | Serum vitamin E                               | Serum folate                                  |
|                                      |                        | Serum $\beta$ carotene                        | Serum vitamin A                               |
|                                      |                        |                                               | Serum vitamin E                               |
|                                      |                        |                                               | Serum $\beta$ carotene                        |

<sup>a</sup> In Standard 1, covariates were selected by a change in effect estimate of more than 10% when they were introduced in crude model or dropped in complete model.

<sup>b</sup> In Standard 2, covariates further included those associated with *H. pylori* CagA seropositivity (defined as *p*-value < 0.1).

**Table S5.** Comparison of primary outcomes between complete data and imputed data from multiple imputation (adjusted OR and 95% CI for the association of serum 25(OH)D concentrations with *H. pylori* CagA seropositivity).

| Effect modifier             | Complete data <sup>a</sup> | Multiple imputation |
|-----------------------------|----------------------------|---------------------|
| <b>Overall</b>              | 1.01 (0.99,1.02)           | 1.02 (0.99,1.04)    |
| <b>Age Group (years)</b>    |                            |                     |
| 20~29                       | 1.00 (0.97, 1.03)          | 1.00 (0.97, 1.03)   |
| 30~39                       | 1.03 (0.99, 1.05)          | 1.03 (0.99, 1.06)   |
| 40~49                       | 1.00 (0.97, 1.02)          | 0.99 (0.97, 1.03)   |
| 50~59                       | 1.01 (0.98, 1.04)          | 1.01 (0.98, 1.04)   |
| 60~69                       | 0.99 (0.97, 1.02)          | 0.99 (0.97, 1.02)   |
| 70~79                       | 1.02 (0.99, 1.05)          | 1.02 (0.99, 1.05)   |
| ≥80                         | 1.02 (0.98, 1.05)          | 1.02 (0.99, 1.05)   |
| <b>Sex</b>                  |                            |                     |
| Male                        | 1.00 (0.99, 1.01)          | 1.00 (0.99, 1.01)   |
| Female                      | 1.01 (0.99, 1.03)          | 1.01 (0.99, 1.03)   |
| <b>Race/Ethnicity</b>       |                            |                     |
| Non-Hispanic white          | 1.02 (1.00, 1.03) *        | 1.02 (1.00, 1.03) * |
| Non-Hispanic black          | 0.99 (0.97, 1.01)          | 0.99 (0.97, 1.02)   |
| Mexican American            | 0.99 (0.98, 1.01)          | 0.99 (0.97, 1.01)   |
| Other                       | 1.08 (1.01, 1.15) *        | 1.08 (1.01, 1.16) * |
| <b>Place of Birth</b>       |                            |                     |
| 50 United States            | 1.00 (0.99, 1.01)          | 1.00 (0.99, 1.01)   |
| Mexico                      | - <sup>†</sup>             | - <sup>†</sup>      |
| Other                       | 1.09 (1.04, 1.14) *        | 1.09 (1.04, 1.15) * |
| <b>Education Level</b>      |                            |                     |
| Less than high school       | 1.01 (0.99, 1.03)          | 1.01 (0.99, 1.03)   |
| High school                 | 1.00 (0.98, 1.01)          | 1.00 (0.98, 1.01)   |
| High school above           | 1.01 (0.99, 1.04)          | 1.02 (0.99, 1.04)   |
| <b>Alcohol Consumption</b>  |                            |                     |
| Never                       | 1.01 (0.99, 1.02)          | 1.01 (0.99, 1.02)   |
| < 1 time/month              | 0.93 (0.88, 0.99) *        | 0.93 (0.88, 0.99) * |
| 2~4 times/month             | 1.00 (0.98, 1.03)          | 1.00 (0.98, 1.03)   |
| > 4 times/month             | 1.01 (0.99, 1.03)          | 1.01 (0.99, 1.03)   |
| <b>Hemoglobin Level</b>     |                            |                     |
| Quartile 1                  | 1.01 (0.99, 1.03)          | 1.01 (0.99, 1.03)   |
| Quartile 2                  | 1.00 (0.98, 1.02)          | 1.00 (0.98, 1.02)   |
| Quartile 3                  | 1.02 (0.99, 1.04)          | 1.02 (0.99, 1.04)   |
| Quartile 4                  | 1.03 (0.92, 1.17)          | 1.01 (0.99, 1.02)   |
| <b>Serum Ferritin Level</b> |                            |                     |
| Quartile 1                  | 1.01 (0.99, 1.03)          | 1.01 (0.99, 1.03)   |
| Quartile 2                  | 1.00 (0.98, 1.02)          | 1.00 (0.98, 1.02)   |
| Quartile 3                  | 1.01 (0.99, 1.03)          | 1.01 (0.99, 1.03)   |
| Quartile 4                  | 1.00 (0.97, 1.02)          | 1.00 (0.98, 1.02)   |
| <b>Serum Folate Level</b>   |                            |                     |
| Quartile 1                  | 1.01 (0.99, 1.03)          | 1.02 (0.99, 1.04)   |
| Quartile 2                  | 1.00 (0.98, 1.02)          | 1.00 (0.98, 1.02)   |
| Quartile 3                  | 0.99 (0.97, 1.01)          | 0.99 (0.97, 1.01)   |
| Quartile 4                  | 1.02 (0.99, 1.04)          | 1.02 (0.99, 1.04)   |

Table S5. (Continued).

| Effect modifier                                | Complete data <sup>a</sup> | Multiple imputation |
|------------------------------------------------|----------------------------|---------------------|
| <b>Serum Vitamin A Level</b>                   |                            |                     |
| Quartile 1                                     | 1.00 (0.97, 1.02)          | 1.00 (0.97, 1.02)   |
| Quartile 2                                     | 1.00 (0.98, 1.02)          | 1.00 (0.98, 1.02)   |
| Quartile 3                                     | 1.01 (0.99, 1.03)          | 1.01 (0.99, 1.03)   |
| Quartile 4                                     | 1.01 (0.99, 1.03)          | 1.01 (0.99, 1.03)   |
| <b>Serum Vitamin E Level</b>                   |                            |                     |
| Quartile 1                                     | 1.01 (0.99, 1.03)          | 1.01 (0.99, 1.03)   |
| Quartile 2                                     | 1.00 (0.98, 1.02)          | 1.00 (0.98, 1.03)   |
| Quartile 3                                     | 1.02 (0.99, 1.04)          | 1.02 (0.99, 1.04)   |
| Quartile 4                                     | 0.99 (0.97, 1.01)          | 0.99 (0.97, 1.01)   |
| <b>Serum <math>\beta</math>-Carotene Level</b> |                            |                     |
| Quartile 1                                     | 1.00 (0.98, 1.02)          | 1.00 (0.98, 1.02)   |
| Quartile 2                                     | 0.99 (0.98, 1.01)          | 0.99 (0.98, 1.01)   |
| Quartile 3                                     | 1.01 (0.99, 1.03)          | 1.01 (0.99, 1.03)   |
| Quartile 4                                     | 1.02 (0.99, 1.04)          | 1.02 (0.99, 1.04)   |

**Note:** Factors were not adjusted when they were used as effect modifiers.

<sup>a</sup> Complete data did not include missing data.

<sup>†</sup> The model failed because of the small sample size of other covariates in this stratum.

\* Statistically significant associations ( $p < 0.05$ ).

**Table S6.** Comparison of primary outcomes between complete data and imputed data from multiple imputation (adjusted OR and 95% CI for the association of vitamin D deficiency with *H. pylori* CagA seropositivity).

| Effect modifier              | Complete data       | Multiple imputation |
|------------------------------|---------------------|---------------------|
| <b>Overall</b>               | 0.90 (0.77, 1.06)   | 0.90 (0.77, 1.05)   |
| <b>Age Group (years)</b>     |                     |                     |
| 20~29                        | 0.99 (0.64, 1.52)   | 0.96 (0.63, 1.46)   |
| 30~39                        | 0.81 (0.53, 1.25)   | 0.78 (0.52, 1.20)   |
| 40~49                        | 0.94 (0.63, 1.41)   | 0.95 (0.64, 1.41)   |
| 50~59                        | 0.83 (0.52, 1.34)   | 0.82 (0.51, 1.31)   |
| 60~69                        | 0.83 (0.57, 1.23)   | 0.87 (0.60, 1.27)   |
| 70~79                        | 0.97 (0.61, 1.54)   | 0.96 (0.61, 1.52)   |
| ≥80                          | 0.68 (0.41, 1.12)   | 0.70 (0.43, 1.13)   |
| <b>Sex</b>                   |                     |                     |
| Male                         | 1.03 (0.83, 1.30)   | 1.02 (0.82, 1.27)   |
| Female                       | 0.79 (0.62, 1.00)   | 0.80 (0.64, 1.00)   |
| <b>Race/Ethnicity</b>        |                     |                     |
| Non-Hispanic white           | 0.69 (0.52, 0.92) * | 0.69 (0.53, 0.92) * |
| Non-Hispanic black           | 1.17 (0.83, 1.65)   | 1.12 (0.80, 1.56)   |
| Mexican American             | 1.01 (0.79, 1.30)   | 1.01 (0.79, 1.29)   |
| Other                        | 0.52 (0.20, 1.34)   | 0.57 (0.23, 1.43)   |
| <b>Place of Birth</b>        |                     |                     |
| 50 United States             | 0.98 (0.81, 1.80)   | 0.95 (0.79, 1.15)   |
| Mexico                       | – †                 | – †                 |
| Other                        | 0.43 (0.23, 0.83) * | 0.47 (0.25, 0.89) * |
| <b>Education Level</b>       |                     |                     |
| Less than high school        | 0.79 (0.61, 1.00)   | 0.78 (0.60, 1.00)   |
| High school                  | 1.19 (0.94, 1.52)   | 1.17 (0.93, 1.47)   |
| High school above            | 0.63 (0.43, 1.00)   | 0.63 (0.42, 1.00)   |
| <b>Alcohol Consumption</b>   |                     |                     |
| Never                        | 0.81 (0.66, 0.99) * | 0.80 (0.65, 0.99) * |
| < 1 time/month               | 2.86 (1.11, 7.35) * | 2.53 (1.06, 6.05) * |
| 2~4 times/month              | 0.95 (0.64, 1.42)   | 0.97 (0.66, 1.42)   |
| > 4 times/month              | 0.96 (0.68, 1.34)   | 0.98 (0.71, 1.37)   |
| <b>Hemoglobin Level</b>      |                     |                     |
| Quartile 1                   | 0.88 (0.62, 1.23)   | 0.87 (0.63, 1.21)   |
| Quartile 2                   | 0.96 (0.70, 1.31)   | 0.93 (0.68, 1.26)   |
| Quartile 3                   | 0.74 (0.53, 1.01)   | 0.74 (0.54, 1.01)   |
| Quartile 4                   | 1.06 (0.77, 1.47)   | 1.09 (0.80, 1.50)   |
| <b>Serum Ferritin Level</b>  |                     |                     |
| Quartile 1                   | 0.71 (0.52, 0.97) * | 0.70 (0.51, 0.96) * |
| Quartile 2                   | 0.87 (0.63, 1.19)   | 0.86 (0.63, 1.19)   |
| Quartile 3                   | 0.91 (0.66, 1.24)   | 0.90 (0.66, 1.24)   |
| Quartile 4                   | 1.12 (0.82, 1.52)   | 1.09 (0.80, 1.48)   |
| <b>Serum Folate Level</b>    |                     |                     |
| Quartile 1                   | 0.85 (0.61, 1.18)   | 0.82 (0.59, 1.13)   |
| Quartile 2                   | 0.97 (0.71, 1.33)   | 0.95 (0.70, 1.29)   |
| Quartile 3                   | 1.24 (0.90, 1.71)   | 1.22 (0.90, 1.68)   |
| Quartile 4                   | 0.62 (0.50, 0.86) * | 0.63 (0.46, 0.87) * |
| <b>Serum Vitamin A Level</b> |                     |                     |
| Quartile 1                   | 0.87 (0.62, 1.23)   | 0.90 (0.65, 1.26)   |
| Quartile 2                   | 1.05 (0.77, 1.43)   | 1.00 (0.74, 1.36)   |
| Quartile 3                   | 0.74 (0.54, 1.02)   | 0.78 (0.57, 1.06)   |
| Quartile 4                   | 0.90 (0.64, 1.26)   | 0.90 (0.65, 1.27)   |



Table S6. (Continued).

| Effect modifier                                | Complete data     | Multiple imputation |
|------------------------------------------------|-------------------|---------------------|
| <b>Serum Vitamin E Level</b>                   |                   |                     |
| Quartile 1                                     | 0.92 (0.66, 1.30) | 0.89 (0.64, 1.24)   |
| Quartile 2                                     | 0.80 (0.56, 1.11) | 0.86 (0.62, 1.81)   |
| Quartile 3                                     | 0.92 (0.68, 1.26) | 0.88 (0.64, 1.19)   |
| Quartile 4                                     | 0.98 (0.72, 1.34) | 0.98 (0.72, 1.33)   |
| <b>Serum <math>\beta</math>-Carotene Level</b> |                   |                     |
| Quartile 1                                     | 1.00 (0.71, 1.44) | 0.98 (0.69, 1.41)   |
| Quartile 2                                     | 1.00 (0.74, 1.34) | 1.00 (0.76, 1.33)   |
| Quartile 3                                     | 0.88 (0.64, 1.22) | 0.85 (0.62, 1.16)   |
| Quartile 4                                     | 0.75 (0.55, 1.04) | 0.76 (0.55, 1.05)   |

**Note:** Factors were not adjusted when they were used as effect modifiers.

<sup>1</sup>Complete data did not include missing data.

<sup>†</sup>The model failed because of the small sample size of other covariates in this stratum.

\* Statistically significant associations ( $p < 0.05$ ).
